# Supplementary material for: Phenolic Composition Influences the Health-Promoting Potential of Bee-Pollen
Source: PubMed Central journal article supplement (PMC6995608; doi:10.3390/biom9120783), 2019-11-26
Supplement: biomolecules-09-00783-s001.pdf [file biomolecules-09-00783-s001.pdf]

# Phenolic Composition Influences the Health-Promoting Potential of Bee-Pollen

Mirjana Mosić<sup>1</sup>, Jelena Trifković<sup>1</sup>, Irena Vovk<sup>2</sup>, Uroš Gašić<sup>3,\*</sup>, Živoslav Tešić<sup>1</sup>,  
Branko Šikoparija<sup>4</sup> and Dušanka Milojković-Opsenica<sup>1,\*</sup>

<sup>1</sup> University of Belgrade—Faculty of Chemistry P.O. Box 51, 11158 Belgrade, Serbia

<sup>2</sup> Department of Food Chemistry, National Institute of Chemistry, Hajdrihova 19, SI-1000 Ljubljana, Slovenia

<sup>3</sup> Institute for Biological Research “Siniša Stanković” — National Institute of Republic of Serbia, University of Belgrade, Bulevar despota Stefana 142, 11060 Belgrade, Serbia

<sup>4</sup> BioSense Institute—Research Institute for Information Technologies in Biosystems, University of Novi Sad, 21000 Novi Sad

\* Correspondence: uros.gasic@ibiss.bg.ac.rs; dusankam@chem.bg.ac.rs (D.M.-O.); Tel.: +381112078385 (U.G.)  
Tel.: +381113336766 (D.M.-O.)

## Content

- Table S1.** Frequency classes [27] of identified pollen types and interpretation of floral origin from results of pollen analysis published in [18].
- Table S2.** Presence of each identified glycoside in bee-pollen samples.
- Table S3.** Total phenolic content (TPC) of bee-pollen samples.
- Figure S1.** Raw data (a) versus preprocessed data (b) of HPTLC profiles.
- Figure S2.** Proposed fragmentation pathway of compounds **14** and **19** ( $m/z$  623).

**Table S1.** Frequency classes [23] of identified pollen types and interpretation of floral origin from results of pollen analysis published in Kostić *et al.*, [16].

| Sample No.       | Sample No. from [16] | Total Pollen Types | Very Frequent (>85%) | Frequent (46–85%)  | Accompanying (16–45%)                                                          | Important Isolated (3–15%)                                                                                                                                  | Floral Origin                          |
|------------------|----------------------|--------------------|----------------------|--------------------|--------------------------------------------------------------------------------|-------------------------------------------------------------------------------------------------------------------------------------------------------------|----------------------------------------|
| P1               | 2                    | 5                  | Brassicaceae (93%)   |                    | -                                                                              | Moraceae                                                                                                                                                    | MONOFLORAL (Brassicaceae)              |
| P2               | 3                    | 25                 | -                    | Fabaceae (48%)     | Brassicaceae (19%)                                                             | Ranunculaceae, <i>Vitis</i>                                                                                                                                 | BIFLORAL (Fabaceae, Brassicaceae)      |
| P3               | 5                    | 14                 | -                    | -                  | Brassicaceae (45%), <i>Salix</i> (35%)                                         | Rosaceae, <i>Vitis</i>                                                                                                                                      | BIFLORAL (Brassicaceae, <i>Salix</i> ) |
| P4               | 8                    | 15                 | -                    | Fabaceae (72%)     | -                                                                              | Brassicaceae, <i>Sophora</i>                                                                                                                                | MONOFLORAL (Fabaceae)                  |
| P5               | 9                    | 15                 | -                    | Fabaceae (50%)     | -                                                                              | Brassicaceae, Rosaceae, <i>Salix</i> , <i>Vitis</i>                                                                                                         | MONOFLORAL (Fabaceae)                  |
| P6               | 10                   | 12                 | -                    | Apiaceae (69%)     | -                                                                              | -                                                                                                                                                           | MONOFLORAL (Apiaceae)                  |
| P7               | 11                   | 18                 | -                    | -                  | Brassicaceae (31%), Fabaceae (18%), Moraceae (18%)                             | Lamiaceae, <i>Salix</i> , <i>Tilia</i>                                                                                                                      | POLYFLORAL                             |
| P8               | 12                   | 12                 | -                    | Brassicaceae (76%) | -                                                                              | <i>Salix</i> , Rosaceae, <i>Sambucus</i> , Apiaceae                                                                                                         | MONOFLORAL (Brassicaceae)              |
| P9               | 13                   | 15                 | -                    | Brassicaceae (53%) | -                                                                              | Apiaceae, Asteraceae, Fabaceae, Ranunculaceae                                                                                                               | MONOFLORAL (Brassicaceae)              |
| P10              | 14                   | 13                 | -                    | Fabaceae (81%)     | -                                                                              | Brassicaceae                                                                                                                                                | MONOFLORAL (Fabaceae)                  |
| P11              | 15                   | 22                 | -                    | -                  | Rosaceae (42%), Fabaceae (23%)                                                 | Asteraceae, <i>Plantago</i>                                                                                                                                 | BIFLORAL (Rosaceae, Fabaceae)          |
| P12              | 16                   | 10                 | -                    | -                  | <i>Plantago</i> (35%), Fabaceae (19%), <i>Ambrosia</i> (19%), Asteraceae (18%) | <i>Zea mays</i>                                                                                                                                             | POLYFLORAL                             |
| P13              | 17                   | 18                 | -                    | -                  | Brassicaceae (34%), Fabaceae (28%)                                             | <i>Helianthus</i> , Ranunculaceae, <i>Tilia</i>                                                                                                             | BIFLORAL (Brassicaceae, Fabaceae)      |
| P14              | 18                   | 17                 | -                    | -                  | Asteraceae (31%), <i>Ambrosia</i> (18%)                                        | Asteraceae, Apiaceae, <i>Artemisia</i> , <i>Helianthus</i> , Brassicaceae, Chenopodiaceae, Ranunculaceae,                                                   | POLYFLORAL                             |
| P15              | 19                   | 23                 | -                    | -                  | Asteraceae (18%)                                                               | Rust spores, Asteraceae, <i>Helianthus</i> , <i>Carduus</i> , Brassicaceae, Fabaceae, <i>Plantago</i> , Poaceae, <i>Zea mays</i> , Ranunculaceae, Rosaceae, | POLYFLORAL                             |
| P16              | 20                   | 22                 | -                    | -                  | Fabaceae (34%), Brassicaceae (25%)                                             | <i>Artemisia</i> , <i>Ambrosia</i> , Ranunculaceae, <i>Vitis</i>                                                                                            | BIFLORAL (Fabaceae, Brassicaceae)      |
| P17 <sup>1</sup> | -                    | 17                 | -                    | -                  | Ranunculaceae (33%), Apiaceae (28%)                                            | -                                                                                                                                                           | BIFLORAL (Ranunculaceae,               |

|                        |    |    |   |                        |                                              |                                                                                                                       |                                                    |
|------------------------|----|----|---|------------------------|----------------------------------------------|-----------------------------------------------------------------------------------------------------------------------|----------------------------------------------------|
| <b>P18</b>             | 21 | 18 | - | Ranunculaceae<br>(76%) | -                                            | Asteraceae, <i>Artemisia</i> , <i>Helianthus</i>                                                                      | Apiaceae)<br>MONOFLORAL<br>(Ranunculaceae)         |
| <b>P19</b>             | 22 | 17 | - | Fabaceae (57%)         | -                                            | Brassicaceae, <i>Ambrosia</i> , <i>Helianthus</i> , <i>Vitis</i>                                                      | MONOFLORAL<br>(Fabaceae)                           |
| <b>P20</b>             | 23 | 7  | - | -                      | <i>Sophora</i> (42%)                         | Asteraceae, Cannabaceae, Brassicaceae                                                                                 | MONOFLORAL<br>( <i>Sophora</i> )                   |
| <b>P21</b>             | 24 | 18 | - | Fabaceae (78%)         | -                                            | Brassicaceae                                                                                                          | MONOFLORAL<br>(Fabaceae)                           |
| <b>P22</b>             | 25 | 12 | - | <i>Sophora</i> (46%)   | <i>Helianthus</i> (21%)                      | Asteraceae, Chenopodiaceae, <i>Zea mays</i> ,<br>Ranunculaceae                                                        | BIFLORAL<br>( <i>Sophora</i> , <i>Helianthus</i> ) |
| <b>P23</b>             | 26 | 19 | - | -                      | Ranunculaceae (24%), <i>Robinia</i><br>(22%) | Asteraceae, <i>Artemisia</i> , <i>Ambrosia</i> ,<br>Chenopodiaceae, Brassicaceae, <i>Cornus</i>                       | POLYFLORAL                                         |
| <b>P24<sup>1</sup></b> | -  | 14 | - | -                      | Apiaceae (38%), Chenopodiaceae<br>(20%)      | Asteraceae, <i>Artemisia</i> , Brassicaceae, Moraceae,<br>Poaceae, <i>Zea mays</i> , unidentified-large<br>reticulate | BIFLORAL<br>(Apiaceae,<br>Chenopodiaceae)          |

<sup>1</sup>Samples **P17** and **P24** were not analysed in Kostić *et al.*, 2015 [16].

**Table S2.** Presence of each identified glycoside in bee-pollen samples.

| Peak No. | Flavonol Glycosides                                                               | Bee-pollen samples |    |    |    |    |    |    |    |    |     |     |     |     |     |     |     |     |     |     |     |     |     |     |     |
|----------|-----------------------------------------------------------------------------------|--------------------|----|----|----|----|----|----|----|----|-----|-----|-----|-----|-----|-----|-----|-----|-----|-----|-----|-----|-----|-----|-----|
|          |                                                                                   | P1                 | P2 | P3 | P4 | P5 | P6 | P7 | P8 | P9 | P10 | P11 | P12 | P13 | P14 | P15 | P16 | P17 | P18 | P19 | P20 | P21 | P22 | P23 | P24 |
| 1        | Quercetin 3,7-di- <i>O</i> -hexoside                                              | -                  | -  | -  | -  | -  | +  | -  | -  | -  | +   | -   | +   | -   | -   | +   | -   | -   | +   | +   | +   | +   | +   | -   | +   |
| 2        | Quercetin 3- <i>O</i> -(6"- <i>O</i> -rhamnosyl)hexoside-7- <i>O</i> -hexoside    | +                  | +  | -  | +  | +  | +  | +  | +  | -  | +   | +   | +   | +   | +   | +   | +   | +   | +   | +   | +   | +   | +   | +   | +   |
| 3        | Quercetin 3- <i>O</i> -(2"- <i>O</i> -hexosyl)hexoside                            | +                  | +  | +  | +  | +  | +  | +  | +  | +  | +   | +   | +   | +   | +   | +   | +   | +   | +   | +   | +   | +   | +   | +   | +   |
| 4        | Kaempferol 3- <i>O</i> -(6"- <i>O</i> -malonyl)hexoside                           | +                  | +  | +  | +  | +  | +  | +  | +  | +  | +   | +   | +   | +   | +   | +   | +   | +   | +   | +   | +   | +   | +   | +   | +   |
| 5        | Kaempferol 3,7-di- <i>O</i> -hexoside                                             | +                  | +  | +  | +  | +  | -  | +  | +  | +  | +   | +   | -   | +   | +   | +   | +   | +   | -   | +   | -   | -   | -   | +   | -   |
| 6        | Isorhamnetin 3- <i>O</i> -(6"- <i>O</i> -rhamnosyl)hexoside-7- <i>O</i> -hexoside | -                  | +  | +  | +  | -  | +  | +  | -  | -  | +   | +   | +   | +   | +   | +   | -   | +   | +   | +   | +   | +   | +   | +   | +   |
| 7        | Isorhamnetin 3,7-di- <i>O</i> -hexoside                                           | -                  | -  | -  | -  | -  | +  | -  | -  | +  | +   | +   | +   | -   | +   | +   | -   | -   | +   | +   | +   | +   | +   | +   | +   |
| 8        | Quercetin 3- <i>O</i> -(2"- <i>O</i> -hexosyl)hexoside-7- <i>O</i> -rhamnoside    | +                  | +  | +  | +  | +  | +  | +  | +  | +  | +   | +   | -   | +   | +   | -   | +   | +   | +   | +   | -   | +   | +   | +   | +   |
| 9        | Quercetin 3- <i>O</i> -(2"- <i>O</i> -pentosyl)hexoside                           | +                  | +  | +  | +  | +  | +  | +  | +  | +  | +   | +   | +   | +   | +   | +   | +   | +   | +   | +   | +   | +   | +   | +   | +   |
| 10       | Isorhamnetin 3- <i>O</i> -(2"- <i>O</i> -hexosyl)hexoside                         | +                  | +  | +  | +  | +  | +  | +  | +  | +  | +   | +   | -   | +   | -   | +   | +   | +   | +   | +   | -   | +   | -   | +   | -   |
| 11       | Quercetin 3- <i>O</i> -(2"- <i>O</i> -rhamnosyl)hexoside                          | -                  | +  | +  | +  | +  | +  | -  | -  | +  | +   | +   | +   | -   | -   | -   | -   | +   | +   | +   | +   | +   | +   | +   | +   |
| 12       | Kaempferol 3- <i>O</i> -(2"- <i>O</i> -hexosyl)hexoside                           | +                  | +  | +  | +  | +  | +  | +  | +  | +  | +   | +   | -   | +   | +   | +   | +   | +   | -   | +   | -   | +   | +   | +   | +   |
| 13       | Kaempferol 3- <i>O</i> -(2"- <i>O</i> -hexosyl)hexoside-7- <i>O</i> -rhamnoside   | +                  | +  | +  | +  | +  | +  | +  | +  | +  | +   | +   | +   | +   | +   | -   | +   | -   | -   | +   | -   | -   | -   | -   | +   |
| 14       | Isorhamnetin 3- <i>O</i> -(2"- <i>O</i> -rhamnosyl)hexoside isomer 1              | +                  | +  | +  | +  | +  | +  | +  | +  | +  | +   | +   | -   | +   | +   | +   | +   | +   | +   | +   | -   | +   | -   | +   | -   |
| 15       | Quercetin 3- <i>O</i> -(6"- <i>O</i> -rhamnosyl)hexoside                          | -                  | -  | -  | -  | -  | -  | -  | -  | -  | -   | -   | -   | -   | -   | -   | -   | -   | -   | -   | -   | +   | -   | +   | -   |
| 16       | Isorhamnetin 3- <i>O</i> -(2"- <i>O</i> -pentosyl)hexoside                        | -                  | -  | -  | -  | -  | +  | -  | -  | -  | -   | +   | +   | -   | -   | +   | +   | -   | +   | +   | +   | -   | -   | +   | +   |
| 17       | Kaempferol 3- <i>O</i> -(2"- <i>O</i> -rhamnosyl)hexoside                         | +                  | +  | +  | +  | +  | +  | +  | +  | +  | +   | +   | +   | +   | +   | +   | +   | +   | +   | +   | +   | +   | +   | +   | +   |
| 18       | Kaempferol 3- <i>O</i> -(2"- <i>O</i> -pentosyl)hexoside                          | +                  | +  | +  | +  | +  | +  | +  | +  | +  | +   | +   | -   | +   | +   | +   | +   | +   | +   | +   | +   | -   | +   | +   | +   |
| 19       | Isorhamnetin 3- <i>O</i> -(2"- <i>O</i> -rhamnosyl)hexoside isomer 2              | -                  | +  | +  | +  | +  | +  | -  | +  | +  | +   | +   | +   | -   | +   | +   | -   | +   | +   | +   | +   | +   | +   | +   | +   |
| 20       | Quercetin 3- <i>O</i> -hexoside                                                   | +                  | +  | +  | +  | +  | +  | +  | +  | +  | +   | +   | +   | +   | +   | +   | +   | +   | +   | +   | +   | +   | +   | +   | +   |
| 21       | Isorhamnetin 3- <i>O</i> -(6"- <i>O</i> -pentosyl)hexoside                        | -                  | -  | +  | +  | +  | -  | -  | -  | -  | -   | +   | -   | -   | -   | -   | -   | -   | -   | -   | -   | -   | -   | -   | -   |
| 22       | Quercetin 3- <i>O</i> -(6"- <i>O</i> -malonyl)hexoside                            | +                  | +  | +  | +  | -  | +  | -  | +  | +  | +   | +   | +   | +   | +   | +   | +   | -   | +   | +   | +   | +   | +   | +   | +   |
| 23       | Isorhamnetin 3- <i>O</i> -(6"- <i>O</i> -rhamnosyl)hexoside                       | -                  | -  | -  | -  | -  | +  | +  | -  | -  | +   | +   | +   | -   | +   | +   | -   | +   | +   | +   | +   | +   | +   | +   | +   |
| 24       | Isorhamnetin 3- <i>O</i> -hexoside isomer 1                                       | +                  | +  | +  | +  | +  | -  | +  | +  | +  | +   | +   | -   | +   | -   | -   | +   | -   | -   | -   | -   | +   | -   | -   | -   |
| 25       | Kaempferol 3- <i>O</i> -hexoside                                                  | +                  | +  | +  | +  | +  | +  | +  | +  | +  | +   | +   | +   | +   | +   | +   | +   | +   | +   | +   | +   | -   | +   | +   | +   |
| 26       | Isorhamnetin 3- <i>O</i> -hexoside isomer 2                                       | -                  | +  | +  | +  | -  | +  | +  | +  | -  | +   | +   | +   | +   | +   | +   | -   | +   | +   | +   | +   | +   | +   | +   | +   |
| 27       | Isorhamnetin 3- <i>O</i> -(6"- <i>O</i> -malonyl)hexoside                         | +                  | +  | +  | +  | +  | +  | +  | +  | +  | +   | +   | -   | +   | -   | -   | +   | +   | -   | -   | -   | -   | -   | -   | -   |

+ stands for detected: - stands for not detected.

**Table S3.** Total phenolic content (TPC) of the bee-pollen samples.

| <b>Sample No</b> | <b>TPC mg GAE/g</b> |
|------------------|---------------------|
| P1               | 15.504 ± 0.146      |
| P2               | 10.925 ± 0.136      |
| P3               | 13.607 ± 0.111      |
| P4               | 8.303 ± 0.059       |
| P5               | 5.600 ± 0.351       |
| P6               | 13.563 ± 0.176      |
| P7               | 23.004 ± 0.351      |
| P8               | 17.983 ± 0.381      |
| P9               | 16.572 ± 0.117      |
| P10              | 8.581 ± 0.088       |
| P11              | 11.819 ± 0.171      |
| P12              | 9.607 ± 0.029       |
| P13              | 12.146 ± 0.039      |
| P14              | 10.990 ± 0.069      |
| P15              | 30.244 ± 0.049      |
| P16              | 11.928 ± 0.098      |
| P17              | 14.286 ± 0.293      |
| P18              | 11.872 ± 0.078      |
| P19              | 13.132 ± 0.234      |
| P20              | 6.542 ± 0.293       |
| P21              | 11.402 ± 0.084      |
| P22              | 5.696 ± 0.107       |
| P23              | 13.004 ± 0.224      |
| P24              | 17.793 ± 0.127      |

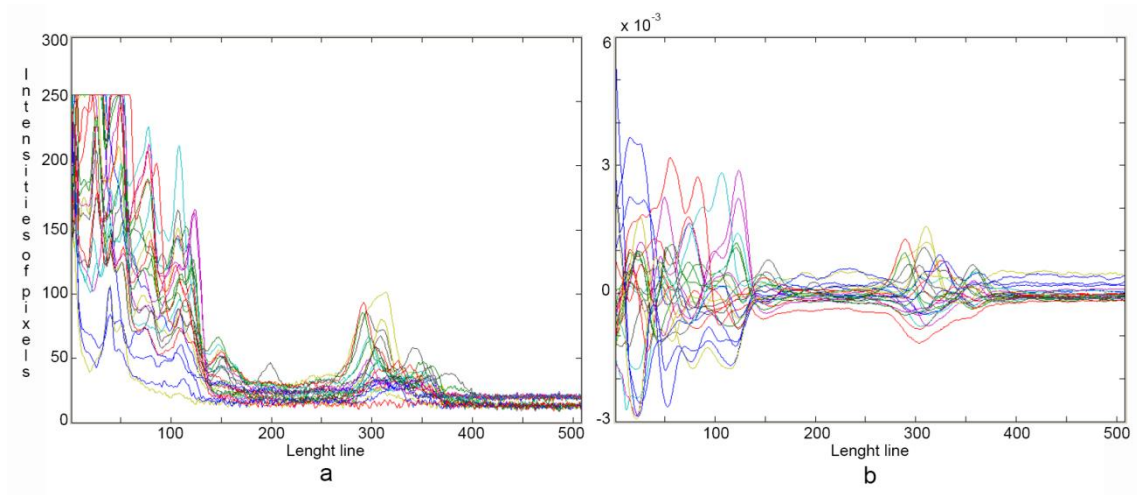

**Figure S1.** Raw data (a) versus preprocessed data (b) of HPTLC profiles.

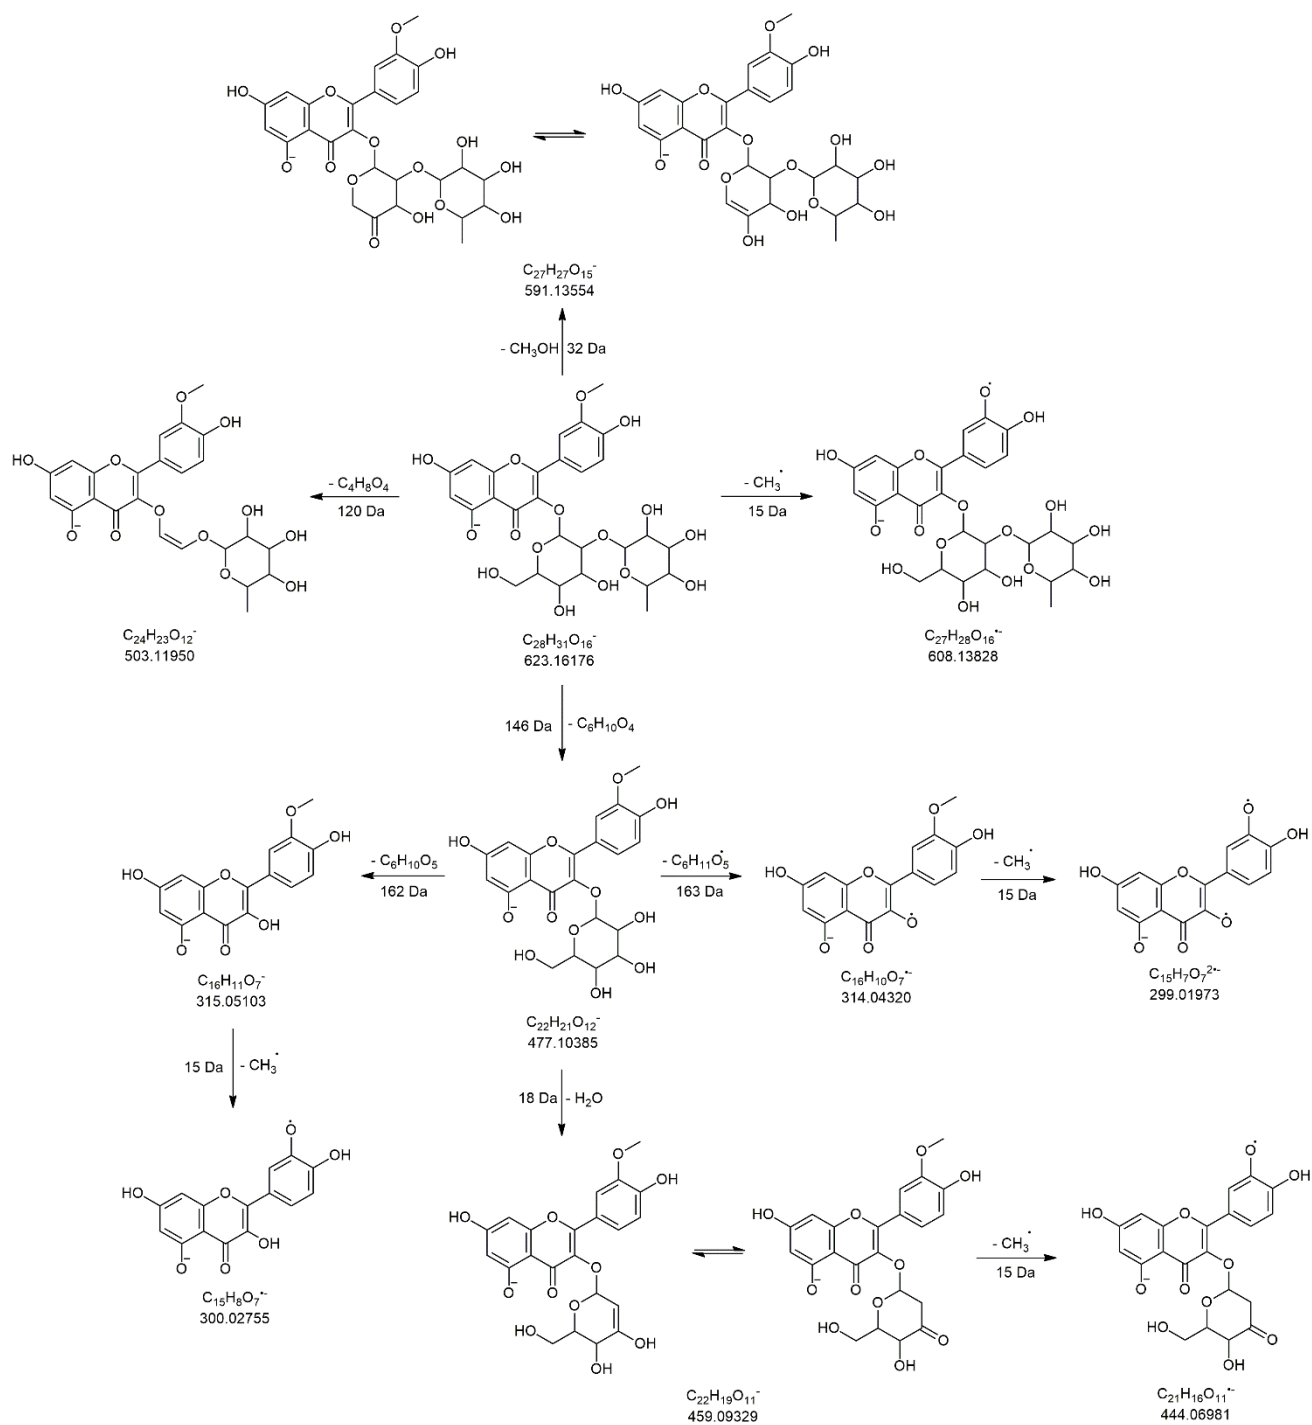

Figure S2. Proposed fragmentation pathway of compounds 14 and 19 ( $m/z$  623).
